# Supplementary material for: Antiproliferative Activity of N-Acylhydrazone Derivative on Hepatocellular Carcinoma Cells Involves Transcriptional Regulation of Genes Required for G2/M Transition
Source: MDPI journal article supplement (doi:10.3390/biomedicines12040892), 2024-04-18
Supplement: s1 [file s1]

Table S1. Sequences of the primers used for amplification in real-time PCR.

| Gene          | Sequence                                                                | Reference      |
|---------------|-------------------------------------------------------------------------|----------------|
| <i>PLK1</i>   | F 5'-CCTGCACCGAAACCGAGTTAT-3'<br>R 5'-CCGTCATATTCGACTTTGGTTGC-3'        | NM_005030.5    |
| <i>CDK1</i>   | F: 5'-ATGAGGTAGTAACACTCTGG-3'<br>R: 5'-CCTATACTCCAAATGTCAACTG-3'        | NM_001786.4    |
| <i>CDKN1A</i> | F 5'- CCATAGCCTCTACTGCCACCATC-3'<br>R 5'- GTCCAGCGACCTTCCTCATCCA-3'     | NM_001291549.1 |
| <i>CCNB1</i>  | F 5'- GTACCCTCCAGAAATTGGTGA-3'<br>R 5'- GACTACATTCTTAGCCAGGTG-3'        | NM_031966.2    |
| <i>AURKA</i>  | F 5'- TCTTCACAGGAGGCAAATCCA-3'<br>R 5'- AATAAGTTACACACTCACTCAGGTACTA-3' | NM_198434.3    |
| <i>AURKB</i>  | F 5'- AAAGAGCCTGTCACCCCATC-3'<br>R 5'- CGCCCAATCTCAAAGTCATC-3'          | NM_001313950.2 |
| <i>CCND1</i>  | F 5'- CCATAGCCTCTACTGCCACCATC-3'<br>R 5'- GTCCAGCGACCTTCCTCATCCA-3'     | NM_001291549.1 |
| <i>FOXMI</i>  | F: 5'-TGCCCAGCAGTCTCTTACCT-3'<br>R: 5'-CTACCCACCTTCTGGCAGTC-3'          | NM_001243089.1 |
| <i>ACTB</i>   | F 5'- AGAGCTACGAGCTGCCTGAC-3'<br>R 5'- AGCACTGTGTTGGCGTACAG-3'          | NM_001101.3    |

F = forward primer; R = reverse primer
